# Supplementary material
Source: publisher figshare collection journal article supplement (https://frontiersin.figshare.com/ndownloader/files/26686064)
Supplement: Supplementary file 1 [file 26686064]

## Sheet: Tabelle1
Table S2: LME table of F- and corrected p-values on the effect of root trenching (‘T’: control and trenched plots), forest type (‘F’: young beech, old beech, unmanaged beech, coniferous) and region (‘R’: Hainich-Dün and Schorfheide-Chorin) on the biomass, species richness of macro-, meso- and microfauna [trophic groups of Nematoda (sum: sum of all Nematoda, B: Bacterial feeding, F: Fungal feeding…
			Trenching		Forest type		Region		T x F		T x R		F x R
			F	p	F	p	F	p	F	p	F	p	F	p
Biomass	Macrofauna	Diplopoda	0.396667	0.698	0.654829	0.728	1.99584	0.488	2.53228	0.298	0.100092	0.87	0.09617	0.977
		Isopoda	0.67009	0.698	0.89267	0.698	1.04099	0.621	0.74426	0.698	0.04087	0.935	1.50326	0.53
		Chilopoda	2.17041	0.488	2.56338	0.298	0.46259	0.698	0.62292	0.728	0.01939	0.954	0.77484	0.698
	Mesofauna	Collembola	9.5349	0.034	1.472	0.53	5.9673	0.112	0.9225	0.698	1.5273	0.53	1.7743	0.488
		Oribatida	7.294	0.071	6.961	0.024	21.726	<0.001	1.192	0.621	0.001	0.977	6.051	0.032
Species richness		Soil macrofauna	2.00978	0.488	1.645	0.517	0.0827503	0.947	2.13393	0.403	0.453607	0.76	1.01365	0.715
		Earthworms	0.0113	0.948	0.87412	0.76	4.16602	0.199	0.54442	0.934	0.01876	0.948	1.40139	0.54
	Mesofauna	Collembola	1.9043	0.488	3.0874	0.197	17.2729	<0.001	0.0682	0.976	0.1082	0.947	4.0804	0.108
		Oribatida	7.5017	0.082	4.816	0.082	4.5885	0.197	1.2676	0.572	0.496	0.76	7.0913	0.015
	Microfauna	Nematoda	0.172	0.934	1.3351	0.54	1.4768	0.54	0.0745	0.947	0.0303	0.948	0.0474	0.948
Abundance of functional groups	Nematoda	sum	1.57765	0.231204	2.4196	0.145792	27.4688	<0.001	0.726645	0.409403	2.47362	0.139784	5.42897	0.0380694
		B	0.0655329	0.832	0.52242	0.66	14.4658	0.03	0.554237	0.66	6.13456	0.135	2.30806	0.388
		HF	1.85782	0.42	3.58635	0.249	39.7641	<0.001	1.40869	0.476	1.60007	0.456	6.969	0.132
		O	1.00302	0.558	0.311867	0.73	5.54699	0.135	0.0642759	0.832	0.867185	0.583	4.5493	0.18
		P	0.123392	0.832	7.2714e-06	0.998	5.68574	0.135	0.384534	0.712	0.711627	0.621	0.276994	0.73
		PF	9.23207	0.075	2.12673	0.392	35.9719	<0.001	4.90894	0.374	0.12633	0.832	2.67333	0.476
